# Supplementary material for: Enhancing Mungbean Yield and Soil Health Through Vermicompost-Based Integrated Nutrient Management Practices in Bangladesh
Source: Preprints.org preprint supplement (doi:10.20944/preprints202411.0539.v1), 2024-11-07
Supplement: Supplementary file 1 [file supplementary]

## Sheet: Sheet1
Parameter	Control (Traditional Fertilization)	Organic Fertilization	Integrated Nutrient Management (INM)
Emergence Rate (%)	72	78	85
Days to Emergence	13	11	8
Growth Metric	Control (Traditional Fertilization)	Organic Fertilization	Integrated Nutrient Management (INM)
Plant Height (cm)	42	48	58
Number of Leaves	10	12	15
Yield Metric	Control (Traditional Fertilization)	Organic Fertilization	Integrated Nutrient Management (INM)
Mungbean Yield (kg/ha)	800	950	1200
Average Seed Weight (g)	5	5.5	6.2
Defects (%)	14	10	4
